# Supplementary material for: Patterns and factors among oncology fellows recommending medical cannabis to adults with cancer
Source: Springer Nature journal article supplement (doi:10.1186/s42238-025-00293-9), 2025-07-14
Supplement: MOESM2 [file 42238_2025_293_MOESM2_ESM.pdf]

# Medical Cannabis Survey

Rushad Patell and Poorva Bindal, Hem Onc Fellows at Beth Israel Deaconess Medical Center in Boston, are conducting a research study about the attitudes and practice around the use of medical marijuana in oncology patients. As a trainee in Oncology/Hematology or allied fields, you are invited to participate in this research study.

If you choose to be in the research study, you will complete the survey below. The survey will take about 10 minutes for you to complete.

You can skip any survey questions that you do not want to answer. Even if you start the survey, you are not required to complete it, partial responses will be saved. You can stop at any time. The survey is anonymous, and no one will be able to link your answers back to you. Please do not include your name or other information that could be used to identify you in the survey responses.

As we know how valuable your time is, we are offering ten \$25 Amazon gift cards, that will be raffled at the end of the research study as an incentive. Include your email address if you are interested in the raffle, this will not be linked to your responses.

Being in this study is voluntary. Please contact Rushad Patell at [rpatell@bidmc.harvard.edu](mailto:rpatell@bidmc.harvard.edu) or Poorva Bindal at [pbindal@bidmc.harvard.edu](mailto:pbindal@bidmc.harvard.edu) with questions about this research study. If you have questions about your rights participating in research or would like to speak with someone independent from the research team, please contact the Human Subject Protection Office (617) 975-8500.

Thank you in advance for your time and participation.

Rushad and Poorva

## USE OF MEDICAL CANNABIS IN PATIENTS WITH CANCER

**Medical cannabis refers to non-pharmaceutical cannabis that healthcare providers recommends for therapeutic purposes. It does not refer to pharmaceutical-grade cannabinoids such as ingested synthetic THC analogs, dronabinol and nabilone**

When you discuss medical cannabis with your oncology patients, who typically starts the conversation?

- More often I do
- Sometimes me and sometimes patients or their families
- More often patients or their families
- I have not discussed medical cannabis with my oncology patients or their families

In the past year, for approximately how many patients did you recommend cannabis use for cancer-related issues?

- 0-5
- 6-10
- 11-20
- 21-30
- 31-40
- >40

In the past year, for approximately how many patients did you discuss cannabis use for cancer-related issues?

- 0-5
- 6-10
- 11-20
- 21-30
- 31-40
- >40

**Compared to treatment you typically use, how would you rate the effectiveness of medical cannabis for the following cancer related issues?**

**In your opinion, is medical cannabis:**

|                        | Much more effective   | Somewhat more effective | Equally effective     | Somewhat less effective | Much less effective   | I don't know          |
|------------------------|-----------------------|-------------------------|-----------------------|-------------------------|-----------------------|-----------------------|
| Nausea/vomiting        | <input type="radio"/> | <input type="radio"/>   | <input type="radio"/> | <input type="radio"/>   | <input type="radio"/> | <input type="radio"/> |
| Pain                   | <input type="radio"/> | <input type="radio"/>   | <input type="radio"/> | <input type="radio"/>   | <input type="radio"/> | <input type="radio"/> |
| Poor appetite/cachexia | <input type="radio"/> | <input type="radio"/>   | <input type="radio"/> | <input type="radio"/>   | <input type="radio"/> | <input type="radio"/> |
| Depression             | <input type="radio"/> | <input type="radio"/>   | <input type="radio"/> | <input type="radio"/>   | <input type="radio"/> | <input type="radio"/> |
| Poor sleep             | <input type="radio"/> | <input type="radio"/>   | <input type="radio"/> | <input type="radio"/>   | <input type="radio"/> | <input type="radio"/> |
| General coping         | <input type="radio"/> | <input type="radio"/>   | <input type="radio"/> | <input type="radio"/>   | <input type="radio"/> | <input type="radio"/> |
| Anxiety                | <input type="radio"/> | <input type="radio"/>   | <input type="radio"/> | <input type="radio"/>   | <input type="radio"/> | <input type="radio"/> |

To what extent do you think medical cannabis has anti-neoplastic effects?

- To a great extent  
 To some extent  
 To a very small extent  
 None at all  
 I don't know

**To what extent do you think medical cannabis is a useful adjunct to standard treatments for the following cancer related issues?**

|         | To a great extent     | To some extent        | To a very small extent | Not at all            |
|---------|-----------------------|-----------------------|------------------------|-----------------------|
| Pain    | <input type="radio"/> | <input type="radio"/> | <input type="radio"/>  | <input type="radio"/> |
| Anxiety | <input type="radio"/> | <input type="radio"/> | <input type="radio"/>  | <input type="radio"/> |

**In your opinion, how do the risks of medical cannabis use compare to the risks of prescription opioid use?**

**The following risks of medical cannabis use are:**

|                                 | Much higher than opioids | Somewhat higher than opioids | Comparable with opioids | Somewhat lower than opioids | Much lower than opioids | I don't know          |
|---------------------------------|--------------------------|------------------------------|-------------------------|-----------------------------|-------------------------|-----------------------|
| Paranoia/psychosis              | <input type="radio"/>    | <input type="radio"/>        | <input type="radio"/>   | <input type="radio"/>       | <input type="radio"/>   | <input type="radio"/> |
| Anxiety                         | <input type="radio"/>    | <input type="radio"/>        | <input type="radio"/>   | <input type="radio"/>       | <input type="radio"/>   | <input type="radio"/> |
| Depression                      | <input type="radio"/>    | <input type="radio"/>        | <input type="radio"/>   | <input type="radio"/>       | <input type="radio"/>   | <input type="radio"/> |
| Confusion/impaired mentation    | <input type="radio"/>    | <input type="radio"/>        | <input type="radio"/>   | <input type="radio"/>       | <input type="radio"/>   | <input type="radio"/> |
| Falls                           | <input type="radio"/>    | <input type="radio"/>        | <input type="radio"/>   | <input type="radio"/>       | <input type="radio"/>   | <input type="radio"/> |
| Driving difficulties            | <input type="radio"/>    | <input type="radio"/>        | <input type="radio"/>   | <input type="radio"/>       | <input type="radio"/>   | <input type="radio"/> |
| Lung injury                     | <input type="radio"/>    | <input type="radio"/>        | <input type="radio"/>   | <input type="radio"/>       | <input type="radio"/>   | <input type="radio"/> |
| Cancer incidence or progression | <input type="radio"/>    | <input type="radio"/>        | <input type="radio"/>   | <input type="radio"/>       | <input type="radio"/>   | <input type="radio"/> |

|                |                       |                       |                       |                       |                       |                       |
|----------------|-----------------------|-----------------------|-----------------------|-----------------------|-----------------------|-----------------------|
| Addiction      | <input type="radio"/> | <input type="radio"/> | <input type="radio"/> | <input type="radio"/> | <input type="radio"/> | <input type="radio"/> |
| Overdose death | <input type="radio"/> | <input type="radio"/> | <input type="radio"/> | <input type="radio"/> | <input type="radio"/> | <input type="radio"/> |

How concerned are you that smoking cannabis could increase the risk of infection in immunocompromised oncology patients ?

- Very concerned  
 Somewhat concerned  
 A little concerned  
 Not at all concerned

**In your opinion, how often is medical cannabis beneficial for the following types of oncology patients?**

|                                  | Never beneficial      | Rarely beneficial     | Sometimes beneficial  | Usually beneficial    | Always beneficial     | I don't know          |
|----------------------------------|-----------------------|-----------------------|-----------------------|-----------------------|-----------------------|-----------------------|
| Those near the end of life       | <input type="radio"/> | <input type="radio"/> | <input type="radio"/> | <input type="radio"/> | <input type="radio"/> | <input type="radio"/> |
| Those with early stage cancer    | <input type="radio"/> | <input type="radio"/> | <input type="radio"/> | <input type="radio"/> | <input type="radio"/> | <input type="radio"/> |
| Cancer survivors                 | <input type="radio"/> | <input type="radio"/> | <input type="radio"/> | <input type="radio"/> | <input type="radio"/> | <input type="radio"/> |
| Young adults with cancer         | <input type="radio"/> | <input type="radio"/> | <input type="radio"/> | <input type="radio"/> | <input type="radio"/> | <input type="radio"/> |
| Elderly cancer patients          | <input type="radio"/> | <input type="radio"/> | <input type="radio"/> | <input type="radio"/> | <input type="radio"/> | <input type="radio"/> |
| Those on active cancer treatment | <input type="radio"/> | <input type="radio"/> | <input type="radio"/> | <input type="radio"/> | <input type="radio"/> | <input type="radio"/> |
| Cannabis naive patients          | <input type="radio"/> | <input type="radio"/> | <input type="radio"/> | <input type="radio"/> | <input type="radio"/> | <input type="radio"/> |
| Recreational cannabis users      | <input type="radio"/> | <input type="radio"/> | <input type="radio"/> | <input type="radio"/> | <input type="radio"/> | <input type="radio"/> |

What mode(s) of medical cannabis use do you prefer for your oncology patients ?  
Mark all that apply

- Smoking  
 Vaporizing  
 Ingesting Orally  
 Rectal suppository  
 No preference  
 I do not support medical cannabis use of any sort  
 I don't know

Cannabis contains more than 60 active compounds. In general, do you prefer cannabis strains rich in tetrahydrocannabinol (THC) or cannabidiol (CBD) for oncology patients ?

- Rich in tetrahydrocannabinol (THC)  
 Rich in cannabidiol (CBD)  
 Rich in both  
 I do not support medical cannabis use of any sort  
 I don't know

Do you feel you have sufficient knowledge about medicinal use of cannabis to make recommendations for oncology patients?

- Yes  
 No

From which of the following sources do you get the majority of your information on medical cannabis ?

- Peer-reviewed sources  
 Lay media  
 Cannabis dispensaries  
 Patients and families  
 Lecture/webinar by another physician  
 Other sources

If other, please specify:

\_\_\_\_\_

**ABOUT YOU**

In what year were you born?

---

How do you describe yourself?

- Male  
 Female  
 Other

Please indicate your race/ethnicity.

- African-american  
 Asian  
 Hispanic  
 American Indian  
 Pacific Islander  
 White (non-hispanic)  
 Other or combination  
 Prefer not to answer

Have you received any training regarding medical cannabis?

- Yes  
 No

If yes, then in what setting did you receive the training?  
(select all that apply)

- College  
 Medical School  
 Residency  
 Fellowship  
 Webinars  
 Conferences  
 Other

If other, please specify:

---

What year did you graduate from medical school?

---

Where was the medical school located?

- USA  Canada  Another Country

Please specify:

---

What is your area of focus (select all that apply) ?

- Non-Malignant Hematology  
 Malignant Hematology  
 Solid Tumor Oncology  
 Supportive/Palliative Care  
 Other

If other, please specify:

---

In a typical week, approximately how many patients with cancer do you see?

- 0-5  
 6-10  
 11-15  
 16-20  
 21-25  
 26-30  
 >30

---

In a typical week, how many hours do you spend directly seeing patients with cancer?

- 0-10
- 11-20
- 21-30
- 31-40
- 41-50
- 51-60
- >60

---

How would you best characterize the location of your training?

- Academic Hospital
- VA Hospital
- Community-based Practice
- Other

---

If other, please specify:

\_\_\_\_\_

---

In which state is your training program located ?

- Alabama - AL
- Alaska - AK
- Arizona - AZ
- Arkansas - AR
- California - CA
- Colorado - CO
- Connecticut - CT
- Delaware - DE
- Florida - FL
- Georgia - GA
- Hawaii - HI
- Idaho - ID
- Illinois - IL
- Indiana - IN
- Iowa - IA
- Kansas - KS
- Kentucky - KY
- Louisiana - LA
- Maine - ME
- Maryland - MD
- Massachusetts - MA
- Michigan - MI
- Minnesota - MN
- Mississippi - MS
- Missouri - MO
- Montana - MT
- Nebraska - NE
- Nevada - NV
- New Hampshire - NH
- New Jersey - NJ
- New Mexico - NM
- New York - NY
- North Carolina - NC
- North Dakota - ND
- Ohio - OH
- Oklahoma - OK
- Oregon - OR
- Pennsylvania - PA
- Rhode Island - RI
- South Carolina - SC
- South Dakota - SD
- Tennessee - TN
- Texas - TX
- Utah - UT
- Vermont - VT
- Virginia - VA
- Washington - WA
- West Virginia - WV
- Wisconsin - WI
- Wyoming - WY
- Other

---

If other, please specify:

---

---

In the past year, for approximately how many oncology patients did you fill out paperwork allowing them to use medical cannabis in compliance with state law?

---

(Medical cannabis refers to non-pharmaceutical cannabis that healthcare providers recommends for therapeutic purposes. It does not refer to pharmaceutical-grade cannabinoids such as ingested synthetic THC analogs, dronabinol and nabilone.)

---

Please let us know your thoughts on the use of medical cannabis for patients with cancer.

---

---

Please let us know your thoughts on what should be included in a training program for medical cannabis for patients with cancer.

---

---

If you would like to be entered into the raffle for a \$25 gift cards, please enter your email address.

---

(Answers will be kept anonymous)
